# Supplementary material for: Combinatorial effects of non-thermal plasma oxidation processes and photocatalytic activity on the inactivation of bacteria and degradation of toxic compounds in wastewater
Source: Royal Society of Chemistry journal article supplement (doi:10.1039/d1ra09337a), 2022-01-01
Supplement: d1ra09337a1.pdf [file d1ra09337a1.pdf]

## **Supporting Information**

### **Combinatorial effects of non-thermal plasma oxidation processes and photocatalytic activity on the inactivation of bacteria and degradation of toxic compounds in wastewater**

A. Raji <sup>a</sup>, D. Vasu <sup>a</sup>, K. Navaneetha Pandiyaraj <sup>b\*</sup>, Rouba Ghobeira<sup>c</sup>, Nathalie De Geyter<sup>c</sup>, Rino Morent<sup>c</sup>, Vandana Chaturvedi Misra<sup>d</sup>, S. Ghorui<sup>d</sup>, M. Pichumani<sup>e</sup>, R. R. Deshmukh<sup>f</sup> and Mallikarjuna N. Nadagouda<sup>g</sup>

<sup>a</sup> Research Division of Plasma Processing (RDPP), Department of Physics, Sri Shakthi Institute of Engineering and Technology, Coimbatore, 641062, India.

<sup>b</sup> Department of Physics, Sri Ramakrishna Mission Vidyalaya College of Arts and Science, Coimbatore-641020, India

<sup>c</sup>Research Unit Plasma Technology (RUPT), Department of Applied Physics, Faculty of Engineering and Architecture, Ghent University, Ghent, 9000, Belgium.

<sup>d</sup>Laser and Plasma Technology Division, Bhabha Atomic Research Centre, Trombay, Mumbai-400085, India.

<sup>e</sup>Department of Nanoscience and Technology, Sri Ramakrishna Engineering College, Coimbatore-641022, India

<sup>f</sup>Department of Physics, Institute of Chemical Technology, Matunga, Mumbai, India

<sup>g</sup>Department of Mechanical and Materials Engineering, Wright State University, Dayton, Ohio 45324, United States.

## **S1. Materials and Methods**

Photoluminescence (PL) spectra of the nanoparticles (NPs) were recorded using a spectrofluorometer (FP8300, JASCO, Japan). The optical properties of TiO<sub>2</sub> and Cu-TiO<sub>2</sub> were examined by ultraviolet-visible diffuse reflection spectroscopy (UV-Vis DRS) using a UV-Visible NIR spectrophotometer (V-770, JASCO, Japan).

## **S2. Results and Discussion**

### **S2.1. UV-Vis DRS spectral analysis**

**Figure-S1a** shows the UV-Vis absorbance spectra of the synthesized pure TiO<sub>2</sub> and Cu-TiO<sub>2</sub> NPs. The pure TiO<sub>2</sub> displayed an absorbance peak at approximately 365 nm representing a typical bandgap energy of 3.08 eV [1-3]. Doping TiO<sub>2</sub> NPs with Cu generally causes a narrowing band gap, which reduces the rate of electron-hole recombination resulting

in a red shift [4]. Contradictorily, in our case, a shift in the absorbance peak towards lower wavelength of approximately 295 nm (blue shift) was observed. This blue shift might be due to the quantum size effect [4]. Moreover, the increment in particle size of Cu-TiO<sub>2</sub> probably caused a decrement in the absorbance spectrum wavelength (blue shift) [5]. In the absorbance spectrum, the intensity of the absorbance maxima (relative maxima) increased. The addition of metal (i.e. Cu in our case) probably initiated this hyperchromic shift in the absorbance maxima intensity. The DRS peaks of pure TiO<sub>2</sub> and Cu-TiO<sub>2</sub> were observed at 3.08 and 2.88 eV respectively. This is due to the oxygen vacancies and the sub-band states of the Cu dopant [6] (**Figure-S1b**). Hence, the observed bandgap decreased in the Cu-doped TiO<sub>2</sub> NPs. The obtained results also support the hypothesis of the particle size – band gap relation (the band gap decreased when the particle size increased).

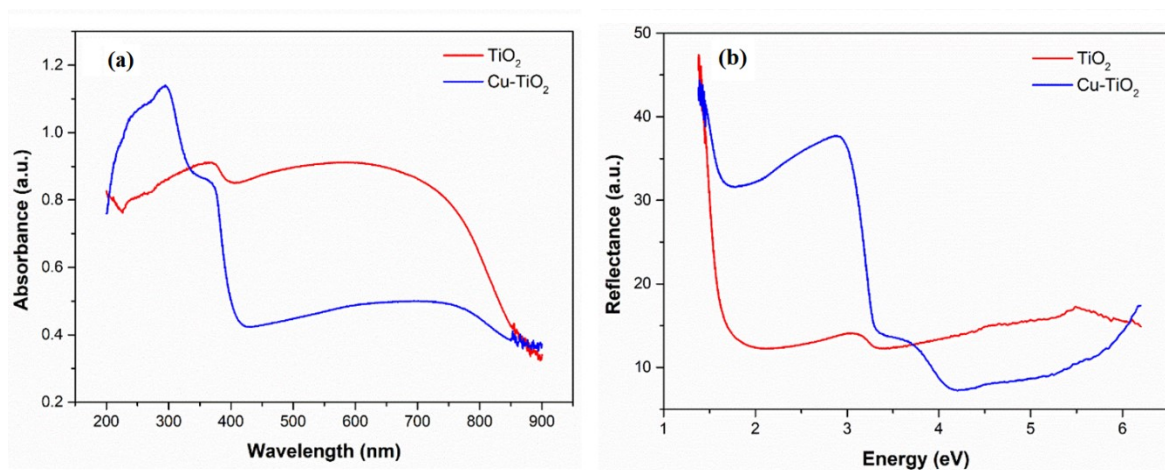

**Figure- S1 (a) UV-Vis spectra and (b) diffuse reflection spectra of TiO<sub>2</sub> and Cu-TiO<sub>2</sub> NPs**

## **S2.2. Photoluminescence emission spectral analysis**

**Figure-S2**, depicting the PL spectra of pure TiO<sub>2</sub> and Cu-TiO<sub>2</sub> NPs, shows that the emission intensity of the Cu-TiO<sub>2</sub> NPs is slightly higher than the pure TiO<sub>2</sub> NPs without any shifts in the emission wavelength. Since the size of the Cu-TiO<sub>2</sub> NPs is larger than the pure ones, the surface-to-volume ratio was also decreased. This increased the oxygen defects and vacancies, which further up surged the photoluminescence intensity thus enhancing the photocatalytic activity of the Cu-TiO<sub>2</sub> NPs [7].

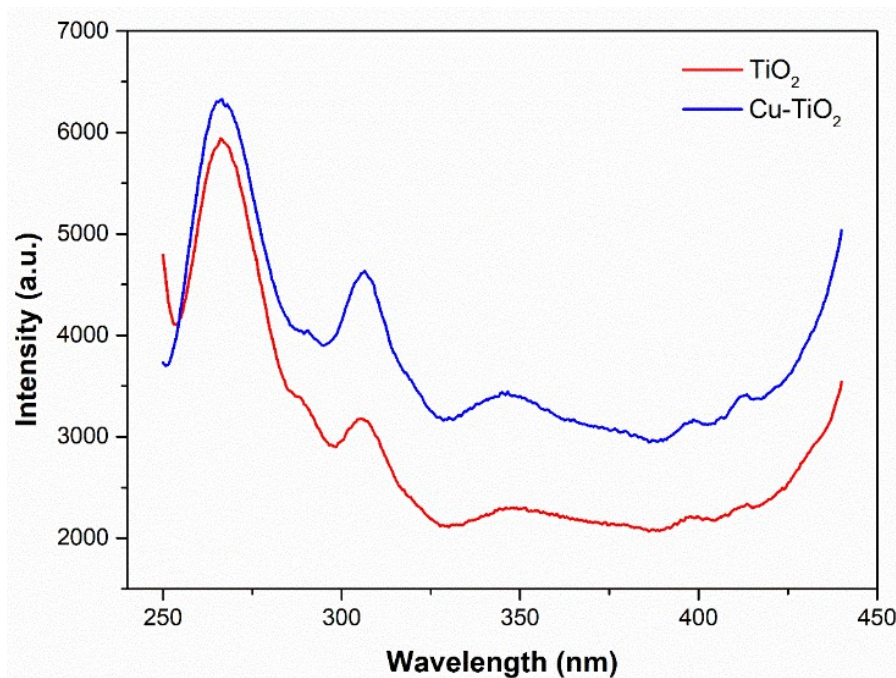

**Figure-S2 Photoluminescence (PL) spectra of TiO<sub>2</sub> and Cu-TiO<sub>2</sub> NPs**

## References

- [1] J. Panda, U.P. Singh, R. Sahu, Synthesis, characterization of TiO<sub>2</sub> nano particles for enhancement of electron transport application in DSSC with Cu-BPCA Dye, IOP Conf. Ser. Mater. Sci. Eng. 410 (2018) 012008.
- [2] N.K. Sethy, Z. Arif, P.K. Mishra, P. Kumar, Green synthesis of TiO<sub>2</sub> nanoparticles from Syzygium cumini extract for photo-catalytic removal of lead (Pb) in explosive industrial wastewater, Green Process. Synth. 9 (2020) 171–181.
- [3] R. Nankya, K.N. Kim, Sol-gel synthesis and characterization of Cu-TiO<sub>2</sub> nanoparticles with enhanced optical and photocatalytic properties, J. Nanosci. Nanotechnol. 16 (2016) 11631–11634.
- [4] C.Y. Tsai, H.C. Hsi, T.H. Kuo, Y.M. Chang, J.H. Liou, Preparation of Cu-doped TiO<sub>2</sub> photocatalyst with thermal plasma torch for low-concentration mercury removal, Aerosol Air Qual. Res. 13 (2013) 639–648.
- [5] E.G. Goh, X. Xu, P.G. McCormick, Effect of particle size on the UV absorbance of zinc oxide nanoparticles, Scr. Mater. 78–79 (2014) 49–52.
- [6] T. Raguram, K.S. Rajni, Synthesis and analysing the structural, optical, morphological, photocatalytic and magnetic properties of TiO<sub>2</sub> and doped (Ni and Cu) TiO<sub>2</sub> nanoparticles by

sol–gel technique, *Appl. Phys. A Mater. Sci. Process.* 125 (2019) 288.

[7] S. Mandal, N. Jain, M.K. Pandey, S.S. Sreejakumari, P. Shukla, A. Chanda, S. Som, S. Das, J. Singh, Ultra-bright emission from Sr doped TiO<sub>2</sub> nanoparticles through r-GO conjugation, *R. Soc. Open Sci.* 6 (2019) 190100.
